# Supplementary material
Source: Springer Nature journal article supplement (https://www.springermedizin.de/resource/supplementary/12978_2007_31_MOESM2_ESM.pdf/9602708)

# Funnel Plot of Precision by Log Peto odds ratio

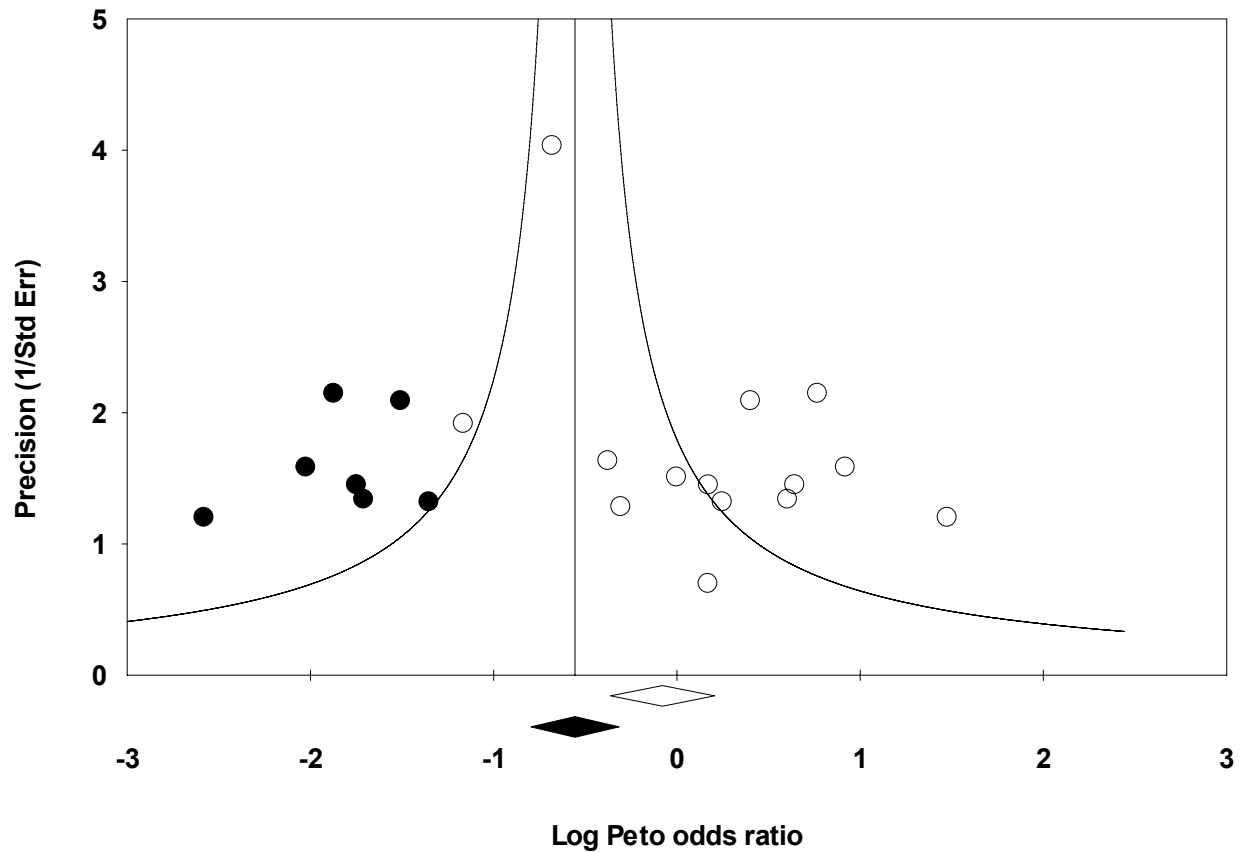

Supplement: MOESM2 [file 9602708]
